# Supplementary material for: Facile preparation of fluorescent water-soluble non-conjugated polymer dots and fabricating an acetylcholinesterase biosensor
Source: Royal Society of Chemistry journal article supplement (doi:10.1039/d1ra07854b), 2022-01-01
Supplement: d1ra07854b1.pdf [file d1ra07854b1.pdf]

# **Facile preparation of fluorescent water-soluble none-conjugated polymer dots and fabricating acetylcholinesterase biosensor**

Cai-Hong Li <sup>a,b</sup>, Wei-Feng Wang <sup>a</sup>, Nsanzamahoro Stanislas <sup>a,b</sup>, Jun-Li Yang <sup>a,\*</sup>

<sup>a</sup> CAS Key Laboratory of Chemistry of Northwestern Plant Resources, Key Laboratory for Natural Medicine of Gansu Province, Lanzhou Institute of Chemical Physics, Chinese Academy of Sciences (CAS), Lanzhou 730000, P. R. China

<sup>b</sup> University of Chinese Academy of Sciences, Beijing 100049, P. R. China

\*Corresponding Author

Tel/Fax: +86-931-4968385. E-mail: yangjl@licp.cas.cn (J.-L. Yang).

# Content

|                       |           |
|-----------------------|-----------|
| <b>Fig. S1</b> .....  | <b>3</b>  |
| <b>Fig. S2</b> .....  | <b>4</b>  |
| <b>Fig. S3</b> .....  | <b>5</b>  |
| <b>Fig. S4</b> .....  | <b>6</b>  |
| <b>Fig. S5</b> .....  | <b>7</b>  |
| <b>Fig. S6</b> .....  | <b>8</b>  |
| <b>Fig. S7</b> .....  | <b>9</b>  |
| <b>Fig. S8</b> .....  | <b>10</b> |
| <b>Fig. S9</b> .....  | <b>11</b> |
| <b>Fig. S10</b> ..... | <b>12</b> |
| <b>Fig. S11</b> ..... | <b>13</b> |
| <b>Fig. S12</b> ..... | <b>15</b> |
| <b>Table S1</b> ..... | <b>15</b> |

**Fig. S1**

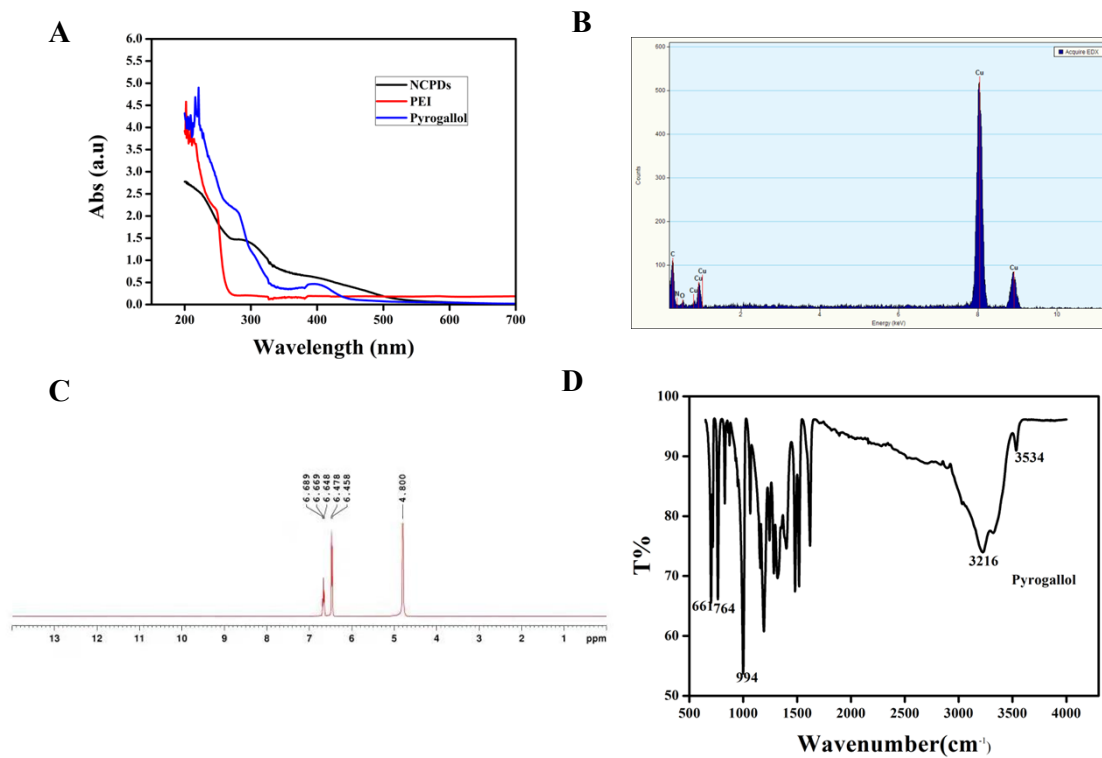

(A) UV-vis absorption spectra of NCPDs, PEI and Pyrogallol, respectively (B) The EDS of NCPDs (C) NMR spectra of Pyrogallol (D) FT-IR spectroscopy of Pyrogallol

**Fig.S2**

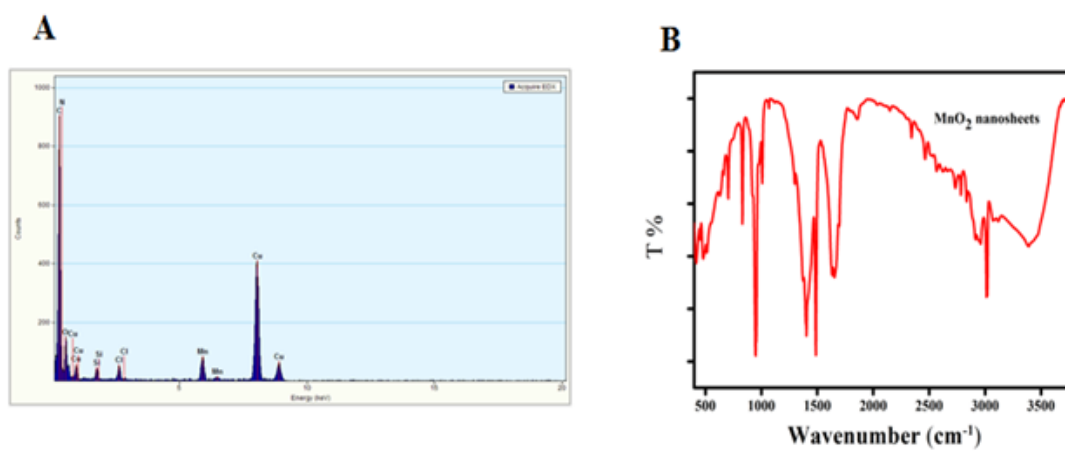

(A) The EDS of MnO<sub>2</sub> nanosheets (B) The FT-IR spectra of MnO<sub>2</sub> nanosheets

**Fig. S3**

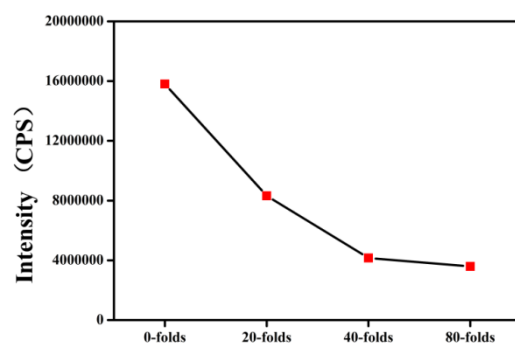

Relationship between fluorescent intensity and diluted folds of NCPDs

**Fig. S4**

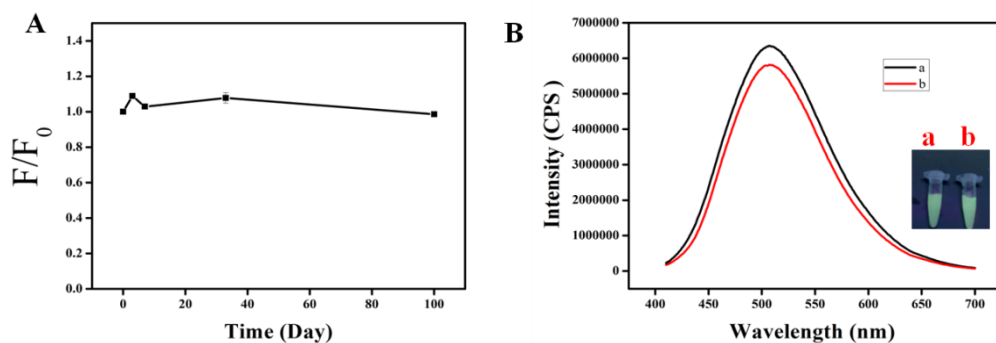

(A) The relationship between relatively fluorescent intensity ( $F/F_0$ ) of NCPDs and storage time (B) Fluorescent emission spectra of NCPDs fresh prepared (black line) and after preserved 6 months (red line) The inset photographs showed new and old NCPDs under UV light

**Fig. S5**

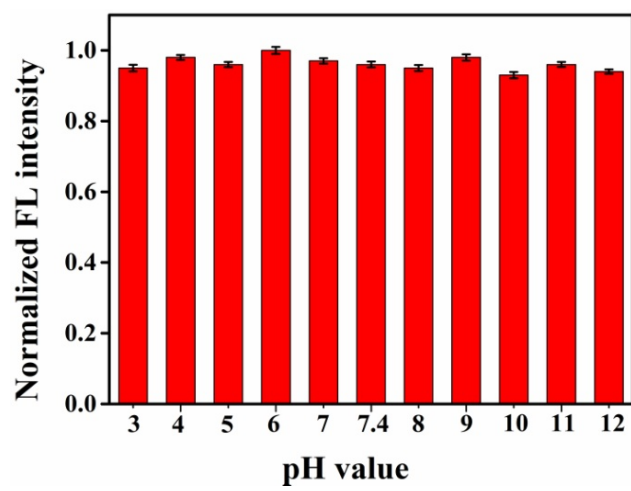

The stability of NCPDs at various PH values

**Fig. S6**

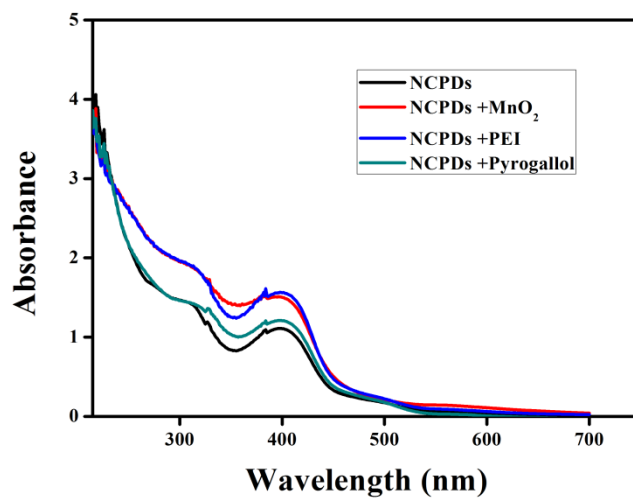

UV-vis absorption spectra of NCPDs adding with MnO<sub>2</sub> nanosheets, PEI and Pyrogallol



**Fig.S7**

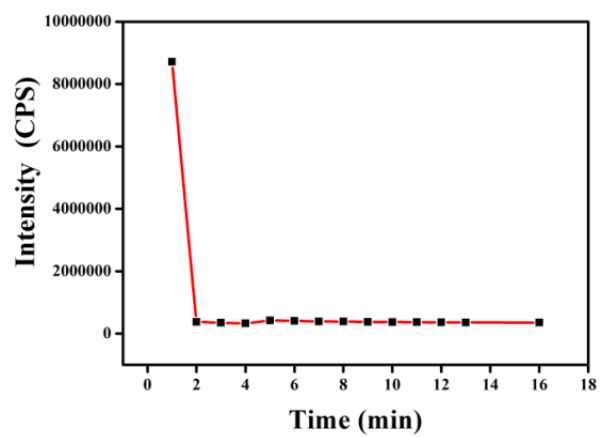

Response time of the NCPDs-MnO<sub>2</sub> biosystem (12.3 μM)

**Fig. S8**

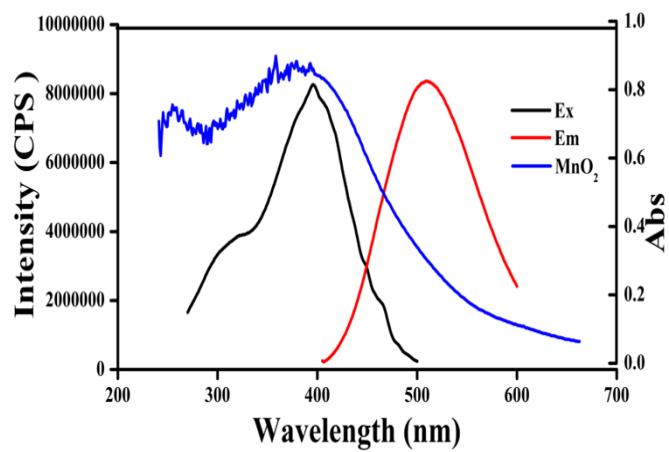

The overlap of excitation and emission spectra of NCPDs and UV-vis absorption spectra of MnO<sub>2</sub> nanosheets

**Fig. S9**

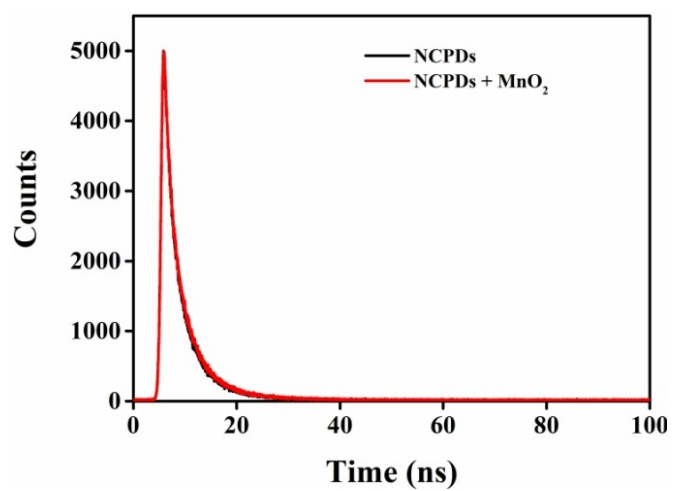

Decay curves of NCPDs in the absence (black curve) and presence (red curve) of MnO<sub>2</sub> nanosheets,  $\lambda_{\text{ex}} = 396 \text{ nm}$  and  $\lambda_{\text{em}} = 507 \text{ nm}$

**Fig. S10**

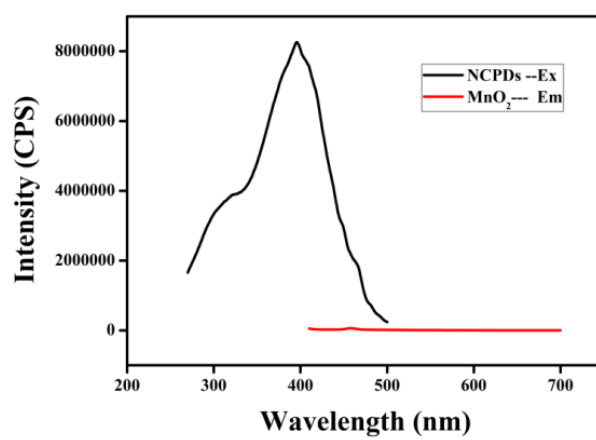

The overlap of excitation spectra of NCPDs and emission spectrum of MnO<sub>2</sub> nanosheets

**Fig. S11**

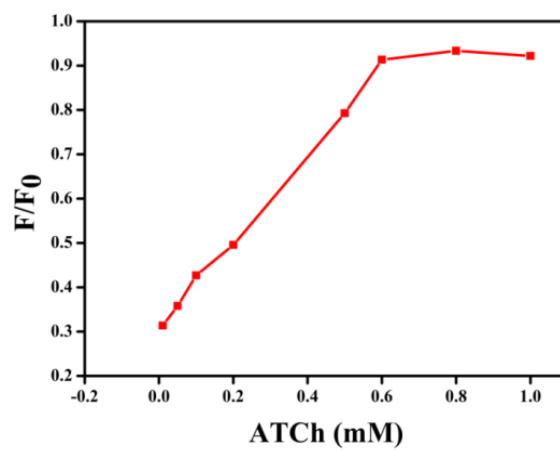

Optimization the substrate concentration

IE was analyzed by the following equation:

$$IE = \frac{F_{no-inhibitor} - F_{inhibitor}}{F_{no-inhibitor} - F_0} \quad (1)$$

$F_{inhibitor}$  and  $F_{no-inhibitor}$  represent the fluorescent intensity of AChE-NCPDs-MnO<sub>2</sub> system and AChE-NCPDs-MnO<sub>2</sub>-inhibitor system, respectively.  $F_0$  refers to the fluorescent intensity of the NCPDs-MnO<sub>2</sub> system without AChE and inhibitor. <sup>1</sup>

**Fig. S12**

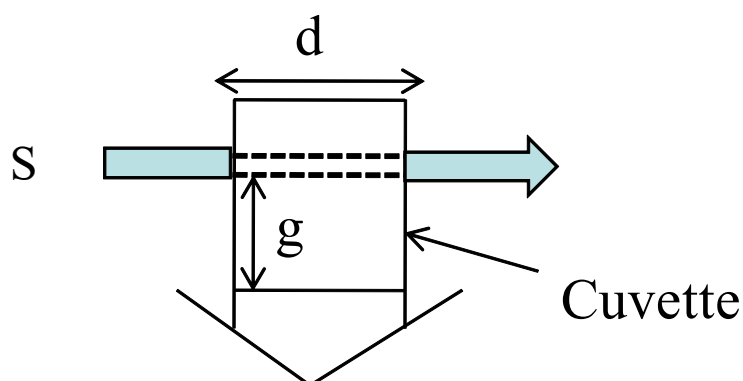

Cuvette geometry and parameters used in equation

$$\frac{F_{cor}}{F_{obsd}} = \frac{2.3dA_{ex}}{1 - 10^{-dA_{ex}}} 10^{gA_{em}} \frac{2.3sA_{em}}{1 - 10^{-sA_{em}}} \quad (2)$$

**Table S1** IFE of MnO<sub>2</sub>nanosheets on the fluorescence of NCPDs

| MnO <sub>2</sub><br>μM | A <sub>ex</sub> | A <sub>em</sub> | F <sub>obsd</sub> | F <sub>cor</sub> | CF   | F <sub>cor</sub> /F <sub>coro</sub> |
|------------------------|-----------------|-----------------|-------------------|------------------|------|-------------------------------------|
| 0.00                   | 0.28152         | 0.075           | 5.03E+06          | 7.44E+06         | 1.48 | 1.00                                |
| 1.27                   | 0.34388         | 0.095           | 4.40E+06          | 7.09E+06         | 1.61 | 1.05                                |
| 1.86                   | 0.36919         | 0.105           | 4.10E+06          | 6.84E+06         | 1.67 | 1.09                                |
| 2.92                   | 0.44468         | 0.129           | 3.85E+06          | 7.12E+06         | 1.85 | 1.13                                |
| 3.42                   | 0.49078         | 0.148           | 3.64E+06          | 6.57E+06         | 1.98 | 1.03                                |
| 6.81                   | 0.71132         | 0.229           | 2.78E+06          | 7.34E+06         | 2.64 | 1.01                                |

$F_{obsd}$  is the observed fluorescence intensity and  $F_{cor}$  is the corrected fluorescence intensity by removing IFE contribution from . and represent the absorbance at the excitation wavelength ( =396 nm) and maximum emission wavelength ( <sub>m</sub>=507 nm), respectively; s is the thickness of excitation beam (5 nm), g is the distance between the edge of the excitation beam and the edge of the cuvette

(0.60 cm in this case) and  $d$  is the width of the cuvette (1.00 cm) (Table S1 summarizes the parameters used in calculating the contribution of IFE to the fluorescence quenching process. Corrected factor (CF) is defined as  $CF = F_{\text{obsd}} / F_0$ . The maximum value of CF could not exceed 3; otherwise, the correction is not convincing.  $F_0$  and  $F$  are the corrected fluorescence intensities of NCPDs in the absence and presence of  $\text{MnO}_2$  nanosheets, respectively.

### Calculation of the Quenching Efficiency

The quenching efficiency (E) was calculated according to the formula

$$E = \left(1 - \frac{F}{F_0}\right) \times 100\% \quad (3)$$

$F_0$  is the fluorescence intensity of NCPDs and  $F$  represents the fluorescence intensity of NCPDs quenched by  $\text{MnO}_2$  nanosheets.

### Reference:

1. Y. Zhang, T. Hei, Y. Cai, Q. Gao and Q. Zhang, *Anal. Chem.*, 2012, **84**, 2830-2836.
